# Supplementary material for: Ubiquity and Diversity of Human-Associated Demodex Mites
Source: PLoS One. 2014 Aug 27;9(8):e106265. doi: 10.1371/journal.pone.0106265 (PMC4146604; doi:10.1371/journal.pone.0106265)
Supplement: Material S2 — Tree file for the maximum likelihood (ML) tree. (TRE) [file pone.0106265.s003.tre]

#NEXUS
[Maximimum likelihood topology based on 18S rDNA sequences of Demodex species.]
begin trees;
translate
 1 AY620908,
 2 JF834894,
 3 HQ728000,
 4 KF745881,
 5 KF745886,
 6 KF745887,
 7 KF745890,
 8 KF745876,
 9 KF745889,
 10 KF745888,
 11 GU377177,
 12 JN885463,
 13 JN885464,
 14 HQ727998,
 15 JN885468,
 16 KC010484,
 17 KC010485,
 18 JN885469,
 19 HQ718592,
 20 GU337178,
 21 JN885466,
 22 HQ727999,
 23 JN885465,
 24 KF745892,
 25 KF745878,
 26 KF745880,
 27 KF745884,
 28 KF745885,
 29 KF745877,
 30 KF745882,
 31 KF745891,
 32 KF745879,
 33 KF745883,
 34 JN885467,
 35 KC010483;
tree bestREP5 = [&U][!GarliScore -4887.288482][!GarliModel  M1 r  2.29430 4.39883 2.29430 1.00000 5.69916 1.00000 e 0.28723 0.19779 0.24294 0.27205 a 0.78620 p 0.53482 ](((15:0.00132695,(34:0.00111804,(18:0.00126161,((((27:0.00000001,28:0.00067259,26:0.01459247):0.00127335,(33:0.00000001,32:0.00000001):0.00510632):0.00056853,(((30:0.00188093,29:0.00125860):0.00189144,(31:0.00824927,24:0.00000001):0.00062396):0.00062538,25:0.00062157):0.00129028):0.01496742,(20:0.00000001,19:0.00000001):0.00437366,((23:0.00097157,22:0.00279133):0.00257175,21:0.00213015):0.00288299):0.00252163):0.00537112):0.02184588):0.00446923,(14:0.00113126,(16:0.00000001,17:0.00000001):0.00020290):0.00205725):0.00945025,(2:0.00147184,35:0.02656864):0.00253770,1:0.20786583,((10:0.00139759,(7:0.00000001,8:0.00000001):0.00031891):0.00031444,9:0.00190379,4:0.00063266,5:0.00000001,6:0.00063287,((13:0.00995342,11:0.00049301):0.00540774,12:0.01066889):0.00055281,3:0.00319462):0.00401756);
end;
begin paup;
clear;
gett file=PLOSrev_mites100k.best.tre storebr;
lset userbr nst=6 rclass=( 0 1 0 2 3 2 ) rmat=(2.294305 4.398826 2.294305 1.000000 5.699157) base=( 0.287229 0.197785 0.242936) rates=gamma shape=0.786198 ncat=4 pinv=0.534817;
end;
