# Supplementary material for: Ubiquity and Diversity of Human-Associated Demodex Mites
Source: PLoS One. 2014 Aug 27;9(8):e106265. doi: 10.1371/journal.pone.0106265 (PMC4146604; doi:10.1371/journal.pone.0106265)
Supplement: Material S3 — Tree file for the Bayesian inference (BI) tree. (TRE) [file pone.0106265.s004.tre]

#NEXUS

[Bayesian 50% consensus topology based on 18S rDNA sequences of Demodex species.]
begin trees;
   [Note: This tree contains information on the topology, 
          branch lengths (if present), and the probability
          of the partition indicated by the branch.]
   tree con_50_majrule = (AY620908:0.246748,((HQ727998:0.001869,(KC010484:0.001064,KC010485:0.001068)0.61:0.001696)0.93:0.003081,(JN885468:0.002285,((JN885469:0.002192,((HQ718592:0.000708,GU377178:0.000703)1.00:0.005539,(JN885466:0.002879,(HQ727999:0.003708,JN885465:0.001990)1.00:0.003710)1.00:0.004142,((((KF745892:0.000831,KF745891:0.010012)0.79:0.001430,(KF745877:0.002145,KF745882:0.002852)1.00:0.002784)0.98:0.001502,KF745878:0.001418)1.00:0.002163,((KF745880:0.010236,KF745884:0.001967)0.89:0.008133,KF745885:0.001527)1.00:0.002151,(KF745879:0.001195,KF745883:0.000710)1.00:0.007041)1.00:0.017758)1.00:0.003537)1.00:0.006785,JN885467:0.002146)1.00:0.025587)0.98:0.005899)0.97:0.010772,(JF834894:0.002401,KC010483:0.031025)0.94:0.003589,(HQ728000:0.004279,KF745881:0.001434,KF745886:0.000719,KF745887:0.001437,(KF745890:0.000737,KF745876:0.000734)0.85:0.001387,KF745889:0.002878,KF745888:0.002355,(GU377177:0.001279,JN885464:0.012096)1.00:0.007262,JN885463:0.012000)0.87:0.004962);

  end;
