# Supplementary material for: Ubiquity and Diversity of Human-Associated Demodex Mites
Source: PLoS One. 2014 Aug 27;9(8):e106265. doi: 10.1371/journal.pone.0106265 (PMC4146604; doi:10.1371/journal.pone.0106265)
Supplement: Table S1 — Pairwise distances between 18S rDNA sequences from Demodex species. Lower left = Kimura 2-parameter distances; Upper right = number of nucleotide differences. (XLSX) [file pone.0106265.s001.xlsx]

## Sheet: Sheet1
		AY620908 N.messersmithi	JF834894 D.musculi	HQ728000 D.folliculorum	141: KF745881 D.folliculorum	176: KF745887 D.folliculorum	176: KF745886 D.folliculorum	315: KF745890 D.folliculorum	127: KF745876 D.folliculorum	315: KF745889 D.folliculorum	176: KF745888 D.folliculorum	GU377177 D.folliculorum	JN885463 D.folliculorum	JN885464 D.folliculorum	HQ727998 D.canis	JN885468 D.canis	KC010484 D.canis	KC010485 D.canis	JN885469 D.canis	HQ718592 D.brevis	GU377178 D.brevis	JN885466 D.brevis	HQ727999 D.brevis	JN885465 D.brevis	315: KF745892 D.brevis	127: KF745878 D.brevis	127: KF745880 D.brevis	141: KF745884 D.brevis	141: KF745885 D.brevis	127: KF745877 D.brevis	141: KF745882 D.brevis	315: KF745891 D.brevis	127: KF745879 D.brevis	141: KF745883 D.brevis	JN885467 D.canis	KC010483 D.sp. (whitetailed deer)
Neochelacheles messersmithi AY620908			48	48	48	48	48	48	48	48	49	48	47	48	50	51	50	50	50	52	52	51	51	51	51	51	51	51	51	51	51	52	53	53	49	49
D.musculi	JF834894	0.167		5	4	4	4	4	4	4	5	5	5	4	8	9	7	7	10	13	13	12	11	10	14	15	14	14	14	14	14	15	16	16	9	3
D.folliculorum	HQ728000	0.167	0.016		1	1	1	1	1	1	2	0	2	1	7	10	8	8	11	12	12	13	12	11	14	15	14	14	14	14	14	15	16	16	10	8
D.folliculorum	141: KF745881	0.167	0.013	0.003		0	0	0	0	0	1	1	1	0	8	9	7	7	10	13	13	12	11	10	14	15	14	14	14	14	14	15	16	16	9	7
D.folliculorum	176: KF745887	0.167	0.013	0.003	0		0	0	0	0	1	1	1	0	8	9	7	7	10	13	13	12	11	10	14	15	14	14	14	14	14	15	16	16	9	7
D.folliculorum	176: KF745886	0.167	0.013	0.003	0	0		0	0	0	1	1	1	0	8	9	7	7	10	13	13	12	11	10	14	15	14	14	14	14	14	15	16	16	9	7
D.folliculorum	315: KF745890	0.167	0.013	0.003	0	0	0		0	0	1	1	1	0	8	9	7	7	10	13	13	12	11	10	14	15	14	14	14	14	14	15	16	16	9	7
D.folliculorum	127: KF745876	0.167	0.013	0.003	0	0	0	0		0	1	1	1	0	8	9	7	7	10	13	13	12	11	10	14	15	14	14	14	14	14	15	16	16	9	7
D.folliculorum	315: KF745889	0.167	0.013	0.003	0	0	0	0	0		1	1	1	0	8	9	7	7	10	13	13	12	11	10	14	15	14	14	14	14	14	15	16	16	9	7
D.folliculorum	176: KF745888	0.171	0.016	0.006	0.003	0.003	0.003	0.003	0.003	0.003		2	2	1	9	10	8	8	9	12	12	11	10	9	13	14	13	13	13	13	13	15	15	15	8	8
D.folliculorum	GU377177	0.167	0.016	0	0.003	0.003	0.003	0.003	0.003	0.003	0.006		2	1	7	10	8	8	11	12	12	13	12	11	14	15	14	14	14	14	14	15	16	16	10	8
D.folliculorum	JN885463	0.163	0.016	0.006	0.003	0.003	0.003	0.003	0.003	0.003	0.006	0.006		1	9	10	8	8	11	14	14	13	12	11	15	16	15	15	15	15	15	16	17	17	10	8
D.folliculorum	JN885464	0.167	0.013	0.003	0	0	0	0	0	0	0.003	0.003	0.003		8	9	7	7	10	13	13	12	11	10	14	15	14	14	14	14	14	15	16	16	9	7
D.canis	HQ727998	0.175	0.025	0.022	0.025	0.025	0.025	0.025	0.025	0.025	0.028	0.022	0.029	0.025		3	1	1	15	16	16	17	16	15	18	19	18	18	18	18	18	19	20	20	13	11
D.canis	JN885468	0.178	0.028	0.032	0.028	0.028	0.028	0.028	0.028	0.028	0.032	0.032	0.032	0.028	0.009		2	2	12	15	15	14	13	12	16	17	16	16	16	16	16	17	18	18	12	12
D.canis	KC010484	0.175	0.022	0.025	0.022	0.022	0.022	0.022	0.022	0.022	0.025	0.025	0.025	0.022	0.003	0.006		0	14	17	17	16	15	14	18	19	18	18	18	18	18	19	20	20	12	10
D.canis	KC010485	0.175	0.022	0.025	0.022	0.022	0.022	0.022	0.022	0.022	0.025	0.025	0.025	0.022	0.003	0.006	0		14	17	17	16	15	14	18	19	18	18	18	18	18	19	20	20	12	10
D.canis	JN885469	0.174	0.032	0.035	0.032	0.032	0.032	0.032	0.032	0.032	0.028	0.035	0.035	0.032	0.048	0.038	0.045	0.045		3	3	2	3	2	6	5	4	4	4	6	6	8	6	6	2	13
D.brevis	HQ718592	0.182	0.042	0.038	0.042	0.042	0.042	0.042	0.042	0.042	0.038	0.038	0.045	0.042	0.051	0.048	0.055	0.055	0.009		0	5	6	3	8	7	6	6	6	8	8	10	8	8	5	16
D.brevis	GU377178	0.182	0.042	0.038	0.042	0.042	0.042	0.042	0.042	0.042	0.038	0.038	0.045	0.042	0.051	0.048	0.055	0.055	0.009	0		5	6	3	8	7	6	6	6	8	8	10	8	8	5	16
D.brevis	JN885466	0.178	0.038	0.042	0.038	0.038	0.038	0.038	0.038	0.038	0.035	0.042	0.042	0.038	0.055	0.045	0.051	0.051	0.006	0.016	0.016		3	4	6	5	6	6	6	6	6	8	8	8	4	15
D.brevis	HQ727999	0.178	0.035	0.038	0.035	0.035	0.035	0.035	0.035	0.035	0.032	0.038	0.038	0.035	0.052	0.042	0.048	0.048	0.009	0.019	0.019	0.009		3	3	4	5	5	5	3	3	5	7	7	5	14
D.brevis	JN885465	0.178	0.032	0.035	0.032	0.032	0.032	0.032	0.032	0.032	0.029	0.035	0.035	0.032	0.048	0.038	0.045	0.045	0.006	0.009	0.009	0.013	0.009		6	7	6	6	6	6	6	8	8	8	4	13
D.brevis	315: KF745892	0.179	0.045	0.045	0.045	0.045	0.045	0.045	0.045	0.045	0.042	0.045	0.048	0.045	0.058	0.052	0.058	0.058	0.019	0.025	0.025	0.019	0.009	0.019		1	2	2	2	0	0	2	4	4	8	15
D.brevis	127: KF745878	0.179	0.048	0.048	0.048	0.048	0.048	0.048	0.048	0.048	0.045	0.048	0.051	0.048	0.062	0.055	0.062	0.062	0.016	0.022	0.022	0.016	0.013	0.022	0.003		1	1	1	1	1	3	3	3	7	16
D.brevis	127: KF745880	0.179	0.045	0.045	0.045	0.045	0.045	0.045	0.045	0.045	0.042	0.045	0.048	0.045	0.058	0.051	0.058	0.058	0.013	0.019	0.019	0.019	0.016	0.019	0.006	0.003		0	0	2	2	4	2	2	6	15
D.brevis	141: KF745884	0.179	0.045	0.045	0.045	0.045	0.045	0.045	0.045	0.045	0.042	0.045	0.048	0.045	0.058	0.051	0.058	0.058	0.013	0.019	0.019	0.019	0.016	0.019	0.006	0.003	0		0	2	2	4	2	2	6	15
D.brevis	141: KF745885	0.179	0.045	0.045	0.045	0.045	0.045	0.045	0.045	0.045	0.042	0.045	0.048	0.045	0.058	0.051	0.058	0.058	0.013	0.019	0.019	0.019	0.016	0.019	0.006	0.003	0	0		2	2	4	2	2	6	15
D.brevis	127: KF745877	0.179	0.045	0.045	0.045	0.045	0.045	0.045	0.045	0.045	0.042	0.045	0.048	0.045	0.058	0.052	0.058	0.058	0.019	0.025	0.025	0.019	0.009	0.019	0	0.003	0.006	0.006	0.006		0	2	4	4	8	15
D.brevis	141: KF745882	0.179	0.045	0.045	0.045	0.045	0.045	0.045	0.045	0.045	0.042	0.045	0.048	0.045	0.058	0.052	0.058	0.058	0.019	0.025	0.025	0.019	0.009	0.019	0	0.003	0.006	0.006	0.006	0		2	4	4	8	15
D.brevis	315: KF745891	0.183	0.048	0.048	0.048	0.048	0.048	0.048	0.048	0.048	0.048	0.048	0.052	0.048	0.062	0.055	0.062	0.062	0.025	0.032	0.032	0.025	0.016	0.025	0.006	0.009	0.013	0.013	0.013	0.006	0.006		6	6	10	16
D.brevis	127: KF745879	0.187	0.051	0.051	0.051	0.051	0.051	0.051	0.051	0.051	0.048	0.051	0.055	0.051	0.065	0.058	0.065	0.065	0.019	0.025	0.025	0.025	0.022	0.025	0.013	0.009	0.006	0.006	0.006	0.013	0.013	0.019		0	8	17
D.brevis	141: KF745883	0.187	0.051	0.051	0.051	0.051	0.051	0.051	0.051	0.051	0.048	0.051	0.055	0.051	0.065	0.058	0.065	0.065	0.019	0.025	0.025	0.025	0.022	0.025	0.013	0.009	0.006	0.006	0.006	0.013	0.013	0.019	0		8	17
D.canis	JN885467	0.17	0.028	0.032	0.028	0.028	0.028	0.028	0.028	0.028	0.025	0.032	0.032	0.028	0.042	0.038	0.038	0.038	0.006	0.016	0.016	0.013	0.016	0.013	0.025	0.022	0.019	0.019	0.019	0.0253	0.0253	0.0318	0.025	0.025		12
D.sp. (whitetailed deer) KC010483		0.171	0.009	0.025	0.022	0.022	0.022	0.022	0.022	0.022	0.025	0.025	0.025	0.022	0.035	0.038	0.032	0.032	0.042	0.051	0.051	0.048	0.045	0.042	0.048	0.051	0.048	0.048	0.048	0.0481	0.0481	0.0514	0.055	0.055	0.038
(Supplementary Table 1. Pairwise distances between 18S sequences from Demodex species. Lower left = Kimura 2 distances; Upper right = number of differences.)
